# Supplementary material
Source: MDPI journal article supplement (https://www.mdpi.com/2072-4292/11/12/1506)
Supplement: s1 [file s1]

**Table S1:** The total Sentinel-2 imagery dataset. It shows for each Sentinel-2 image the month, day, platform (Sentinel-2A or Sentinel-2B), the hour of acquisition, the cloud percentage, the processing level (top of the atmosphere – 1C or bottom of the atmosphere – 2A), and the tiles (T33TTG for Lazio north, T33TUF for Lazio south).

| Month     | Day | Platform | Hour  | Cloud (%) | Processing Level | Tiles  |
|-----------|-----|----------|-------|-----------|------------------|--------|
| January   | 01  | S2A      | 10.04 | 0.032     | 1C               | T33TTG |
| January   | 01  | S2A      | 10.04 | 0.778     | 1C               | T33TUF |
| February  | 10  | S2A      | 10.01 | 2.730     | 1C               | T33TTG |
| February  | 10  | S2A      | 10.01 | 5.734     | 1C               | T33TUF |
| March     | 12  | S2A      | 10.01 | 93.575    | 1C               | T33TTG |
| March     | 12  | S2A      | 10.00 | 44.321    | 1C               | T33TUF |
| April     | 11  | S2A      | 10.00 | 9.905     | 1C               | T33TTG |
| April     | 11  | S2A      | 10.00 | 12.132    | 1C               | T33TUF |
| May       | 31  | S2A      | 10.00 | 0.330     | 2A               | T33TTG |
| May       | 31  | S2A      | 10.00 | 1.107     | 2A               | T33TUF |
| June      | 21  | S2A      | 10.00 | 0.661     | 2A               | T33TTG |
| June      | 21  | S2A      | 10.00 | 0.254     | 2A               | T33TUF |
| July      | 20  | S2A      | 10.00 | 0.330     | 2A               | T33TTG |
| July      | 20  | S2A      | 10.00 | 1.107     | 2A               | T33TUF |
| August    | 09  | S2A      | 10.00 | 1.276     | 2A               | T33TTG |
| August    | 09  | S2A      | 10.00 | 3.267     | 2A               | T33TUF |
| September | 23  | S2B      | 10.00 | 11.252    | 1C               | T33TTG |
| September | 23  | S2B      | 10.00 | 13.598    | 1C               | T33TUF |
| October   | 13  | S2B      | 10.00 | 0.107     | 1C               | T33TTG |
| October   | 13  | S2B      | 10.00 | 0.488     | 1C               | T33TUF |
| November  | 11  | S2A      | 10.03 | 0.000     | 1C               | T33TTG |
| November  | 11  | S2A      | 10.03 | 2.636     | 1C               | T33TUF |
| December  | 22  | S2B      | 10.04 | 0.459     | 2A               | T33TTG |
| December  | 22  | S2B      | 10.04 | 0.565     | 2A               | T33TUF |

**Table S2:** Example of error matrix. It is a contingency table ( $k \times k$  array, where  $k$  is the number of classes in the classification).

|                    |   | Google maps attribution = j |          |          | Row total |
|--------------------|---|-----------------------------|----------|----------|-----------|
|                    |   | 1                           | 2        | k        | $n_{i+}$  |
| Mapped Classes = i | 1 | $n_{11}$                    | $n_{12}$ | $n_{1k}$ | $n_{1+}$  |
|                    | 2 | $n_{21}$                    | $n_{22}$ | $n_{2k}$ | $n_{2+}$  |
|                    | k | $n_{k1}$                    | $n_{k2}$ | $n_{kk}$ | $n_{k+}$  |

|              |          |          |          |          |     |
|--------------|----------|----------|----------|----------|-----|
| Column total | $n_{+j}$ | $n_{+1}$ | $n_{+2}$ | $n_{+k}$ | $n$ |
|--------------|----------|----------|----------|----------|-----|

**Equation S1:** Overall accuracy, defined as the total of the correctly classified checkpoints on the total number of the checkpoints where  $n_{ii}$  indicates the number of checkpoints classified in the same category both in the satellite mapped classes and the google earth reference data, in other words the elements of the major diagonal.

$$\text{Overall accuracy} = \frac{\sum_{i=1}^k n_{ii}}{n}$$

**Equation S2:** Producer's accuracy: fraction of correctly classified checkpoints in all checkpoints of the produced classification.

$$\text{Producer's accuracy} = \frac{n_{jj}}{n_{+j}}$$

**Equation S3:** User's accuracy: fraction of correctly classified checkpoints in all checkpoints of the reference data.

$$\text{User's accuracy} = \frac{n_{ii}}{n_{i+}}$$

**Equation S4:** Kappa statistic ( $\hat{K}$ ) computed as follows where  $n_{ij}$  is the number of observation in row  $i$  and column  $j$ ,  $n_{i+}$  and  $n_{+j}$  are respectively the total number of observation of row, and the second total number of observation of column.

$$\hat{K} = \frac{n \sum_{i=1}^k n_{ij} - \sum_{i=1}^k n_{i+} n_{+j}}{n^2 - \sum_{i=1}^k n_{i+} n_{+j}} \quad (\text{D})$$

**Table S3:** Classes of Kappa statistic interpretation. The Kappa statistic is a measure of the difference between the actual agreement of real objects observable on google maps with resulted classes, and an agreement due to chance (where real objects are compared with a random classification). Kappa varies between 0 to 100, where values close to 0 represent a poor agreement, and values close to 100 are indicate as excellent level of agreement.

| Kappa statistic ( $\hat{K}$ ) % | Agreement          |
|---------------------------------|--------------------|
| < 40                            | Poor agreement     |
| 41 – 80                         | Moderate agreement |
| 81 – 100                        | Strong agreement   |

**Figure S1:** A subset of the photointerpreted vegetation map produced at 1:5000 scale by visual interpretation of aerial ortophotos, and a subset of the floristic field data classified according with the Habitats directive (92/43/EEC).

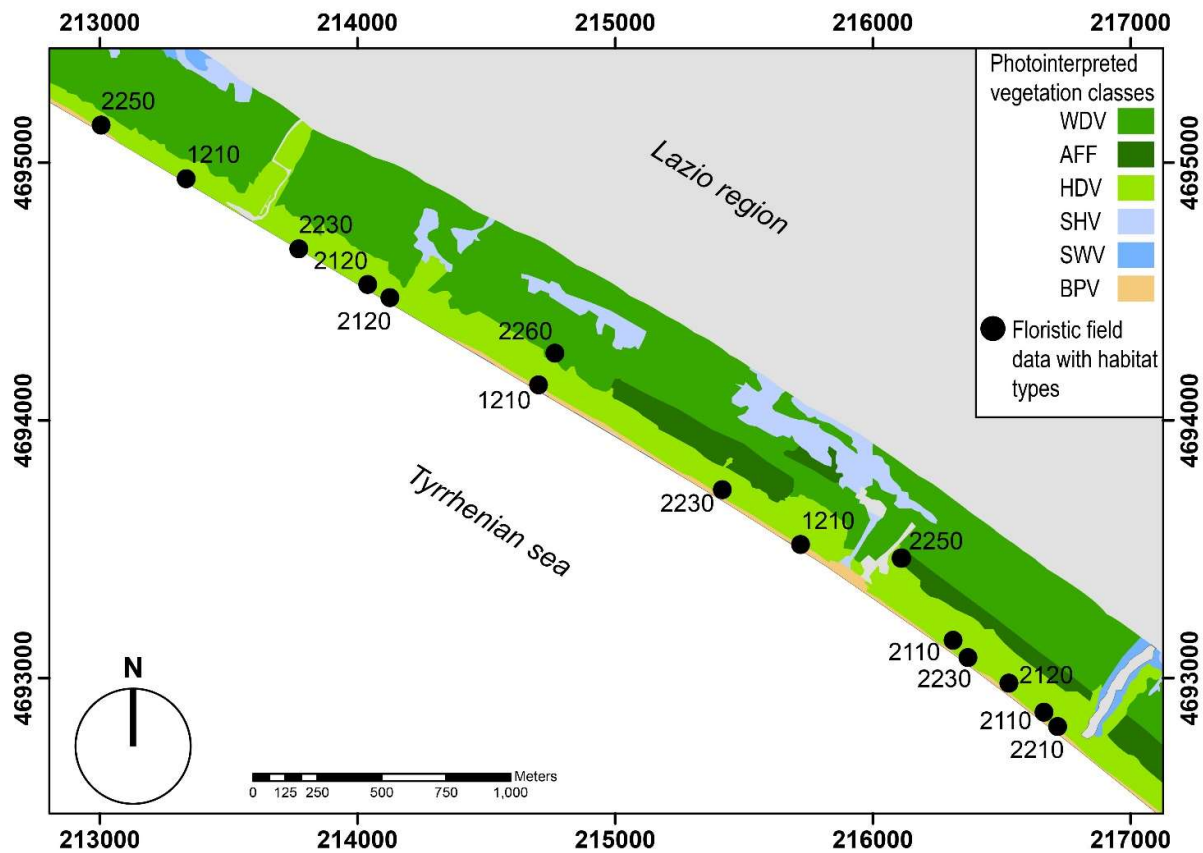

**Table S4:** Nomenclature homogenization between the produced phenology-based map and the vegetation map.

| Vegetation classes<br>(Malavasi, et al. 2016) | Abbreviation | Detailed description                                                                                                                                                                                                                                                                                                                                                                                                                 |
|-----------------------------------------------|--------------|--------------------------------------------------------------------------------------------------------------------------------------------------------------------------------------------------------------------------------------------------------------------------------------------------------------------------------------------------------------------------------------------------------------------------------------|
| Beach with pioneer<br>annual vegetation       | BPV          | Annual, nitrophilus and ephemeral community, exposed to wind disturbance and flooding - Habitat type: 1210.                                                                                                                                                                                                                                                                                                                          |
| Herbaceous dune<br>vegetation                 | HDV          | Pioneer perennial and halophilous community, dominated by dune-forming plants with low vegetation cover and poor sandy substrate - Habitat type: 2110. Perennial herb community growing on mobile dunes, dominated by the rhizomatous tussock grass ( <i>Ammophila arenaria</i> ) – Habitat type: 2120. Perennial herbs community, partially sheltered from winds and dominated by chamaephytic species – Habitat types: 2210, 2230. |
| Semi-natural herbaceous<br>ruderal vegetation | SHV          | Semi-natural herbaceous vegetation, communities with different degrees of degradation or recolonization.                                                                                                                                                                                                                                                                                                                             |

|                               |     |                                                                                                                                                                                                                                                               |
|-------------------------------|-----|---------------------------------------------------------------------------------------------------------------------------------------------------------------------------------------------------------------------------------------------------------------|
| Semi-natural woody vegetation | SWV | Semi-natural woody vegetation: bushy vegetation with scattered trees.                                                                                                                                                                                         |
| Woody dune vegetation         | WDV | Woody dune vegetation growing on fixed dunes. Scrubs with sparse junipers on coastal sand dunes, and evergreen <i>macchia</i> dominated by shrub species with high cover values and less exposed to the harsh coastal conditions – Habitat types: 2250, 2260. |
| Mediterranean Forest          | BMF | Forests dominated by oaks and other broadleaf evergreens – Habitat types: 9340.                                                                                                                                                                               |
| Afforestation                 | AFF | Wooded dunes with <i>Pinus pinea</i> and/or <i>Pinus pinaster</i> – Habitat type: 2270.                                                                                                                                                                       |

| Level | Vegetation classes (Malavasi, et al. 2016) |                               |      |                     |                |
|-------|--------------------------------------------|-------------------------------|------|---------------------|----------------|
| 1°    | BPV.                                       | HDV, SHV, SWV, WDV, BMF, AFF. |      |                     |                |
| 2°    | BPV.                                       | HDV, SHV.                     |      | SWV, WDV, BMF, AFF. |                |
| 3°    | BPV.                                       | HDV.                          | SHV. | WDV.                | SWV, BMF, AFF. |

**Table S5:** Nomenclature homogenization of the EC habitats (92/43/EEC) types: 1210 (Annual vegetation of drift lines), 2110 (Embryonic shifting dunes), 2120 (Shifting dunes along the shoreline with *Ammophila arenaria*), 2210 (*Crucianellion maritimae* fixed beach dunes), 2230 (*Malcolmietalia* dune grasslands), 2250 (Coastal dunes with *Juniperus* spp.), 2260 (*Cisto-Lavanduletalia* dune sclerophyllous scrubs), 2270 (Wooded dunes with *Pinus pinea* and/or *P. pinaster*).

| Level | Natura 2000 habitat types |                                     |                   |       |             |
|-------|---------------------------|-------------------------------------|-------------------|-------|-------------|
| 1°    | 1210, 2110.               | 2120, 2210, 2230, 2250, 2260, 2270. |                   |       |             |
| 2°    | 1210, 2110.               | 2120, 2210, 2230.                   | 2250, 2260, 2270. |       |             |
| 3°    | 1210, 2110.               | 2120, 2210.                         | 2230.             | 2250. | 2260, 2270. |

**Table S6:** Results of the harmonization test (error matrix and Kappa statistic) between phenology-based classes in the first hierarchical level of classification and the photo-interpreted classification map.

| Vegetation classes (Malavasi et al. 2016) |                         |     |                          |                     |
|-------------------------------------------|-------------------------|-----|--------------------------|---------------------|
| Phenology-based classes                   |                         | BPV | HDV-SHV- SWV-WDV-BMR-AFF | User's accuracy (%) |
|                                           | Open Sand               | 35  | 6                        | 85                  |
|                                           | Vegetation              | 5   | 199                      | 98                  |
|                                           | Producer's accuracy (%) | 88  | 98                       |                     |

Overall accuracy (%) = 95;  $\tilde{K}$  (%) = 83

**Table S7:** Results of the harmonization test (error matrix and Kappa statistic) between phenology-based classes and the photo-interpreted classification map in the second hierarchical level of classification.

| Vegetation classes (Malavasi et al. 2016) |                         |     |         |                     |                        |
|-------------------------------------------|-------------------------|-----|---------|---------------------|------------------------|
| Phenology-based<br>classes                |                         | BPV | HDV-SHV | SWV-WDV-<br>BMR-AFF | User's accuracy<br>(%) |
|                                           | Open Sand               | 33  | 6       | 0                   | 85                     |
|                                           | Herbaceous vegetation   | 5   | 52      | 6                   | 83                     |
|                                           | Woody vegetation        | 0   | 32      | 109                 | 77                     |
|                                           | Producer's accuracy (%) | 87  | 58      | 95                  |                        |

Overall accuracy (%) = 80;  $\tilde{K}$  (%) = 67

**Table S8:** Results of the harmonization test (error matrix and Kappa statistic) between phenology-based classes in the third hierarchical level of classification and the photo-interpreted classification map.

| Vegetation classes (Malavasi et al. 2016) |                         |     |     |     |     |                  |                           |
|-------------------------------------------|-------------------------|-----|-----|-----|-----|------------------|---------------------------|
| Phenology-based<br>classes                |                         | BPV | HDV | SHV | WDV | SWV- BMR-<br>AFF | User's<br>accuracy<br>(%) |
|                                           | OS                      | 34  | 6   | 1   | 0   | 1                | 94                        |
|                                           | SHV                     | 2   | 7   | 7   | 1   | 0                | 44                        |
|                                           | DHVR                    | 0   | 1   | 30  | 6   | 3                | 42                        |
|                                           | SWV                     | 0   | 2   | 21  | 11  | 8                | 33                        |
|                                           | DWV                     | 0   | 0   | 13  | 15  | 70               | 85                        |
|                                           | Producer's accuracy (%) | 81  | 41  | 75  | 26  | 71               |                           |

Overall accuracy (%) = 66;  $\check{K}$  (%) = 55

**Table S9:** Results of the harmonization test (error matrix and Kappa statistic) between phenology-based classes in the first hierarchical level of classification and habitats of conservation concern (Habitats Directive; 92/43/EEC; table 1) assigned on 2m floristic plots collected in the field.

| Complex of dune habitats    |                         |            |                                    |                     |
|-----------------------------|-------------------------|------------|------------------------------------|---------------------|
| Phenology-<br>based classes |                         | 1210, 2110 | 2120, 2210, 2230, 2250, 2260, 2270 | User's accuracy (%) |
|                             | Open Sand               | 26         | 6                                  | 81                  |
|                             | Vegetation              | 23         | 80                                 | 78                  |
|                             | Producer's accuracy (%) | 53         | 93                                 |                     |

Overall accuracy (%) = 79;  $\check{K}$  (%) = 50

**Table S10:** Results of the harmonization test (error matrix and Kappa statistic) of between phenology-based classes in the second hierarchical level of classification and habitats of conservation concern (Habitats Directive; 92/43/EEC; table 1) assigned on 2m floristic plots collected in the field.

|                         |                         | Complex of dune habitats |                  |                  | User's accuracy (%) |
|-------------------------|-------------------------|--------------------------|------------------|------------------|---------------------|
| Phenology-based classes |                         | 1210, 2110               | 2120, 2210, 2230 | 2250, 2260, 2270 |                     |
|                         | Open sand               | 26                       | 6                | 0                | 81                  |
|                         | Herbaceous vegetation   | 23                       | 45               | 3                | 62                  |
|                         | Woody vegetation        | 0                        | 5                | 27               | 90                  |
|                         | Producer's accuracy (%) | 53                       | 83               | 84               |                     |

Overall accuracy (%) = 73;  $\tilde{K}$  (%) = 58

**Table S11:** Results of the harmonization test (error matrix and Kappa statistic) between phenology-based classes in the second hierarchical level of classification and habitats of conservation concern (Habitats Directive; 92/43/EEC; table 1) assigned on 2m floristic plots collected in the field.

|                         |                         | Complex of dune habitats |           |      |      |           | User's accuracy (%) |
|-------------------------|-------------------------|--------------------------|-----------|------|------|-----------|---------------------|
| Phenology-based classes |                         | 1210-2110                | 2120-2210 | 2230 | 2250 | 2260-2270 |                     |
|                         | OS                      | 26                       | 2         | 4    | 0    | 0         | 81                  |
|                         | SHV                     | 21                       | 16        | 11   | 1    | 1         | 32                  |
|                         | DHV-R                   | 2                        | 4         | 14   | 1    | 2         | 61                  |
|                         | SWV                     | 0                        | 0         | 2    | 1    | 6         | 11                  |
|                         | DWV                     | 0                        | 0         | 1    | 6    | 14        | 67                  |
|                         | Producer's accuracy (%) | 53                       | 73        | 44   | 11   | 61        |                     |

Overall accuracy (%) = 53;  $\tilde{K}$  (%) = 43
